# Supplementary material
Source: publisher site journal article supplement (https://www.dovepress.com/article/228288)
Supplement: Supplementary file 1 [file get_supplementary_file.php]

| **Table S1. Details of primary antibodies used for Western blotting.** | | | |
| --- | --- | --- | --- |
| Antibodies | Dilution | Supplier | Lot No |
| Anti-CD9 | 1:500 | Abcom, UK | ab92726 |
| Anti-CD63 | 1:100 | Proteintech,USA | 25682-I-AP |
| Anti-Alix | 1:1000 | Abcom, UK | ab117600 |
| Anti- Calnexin | 1:500 | Santa Cruz, USA | sc-11397 |
| Anti-ITGαV | 1:2000 | Abcom, UK | ab179475 |
| Anti-ITGβ1 | 1:2000 | Abcom, UK | ab5297 |
| Anti-ITGβ3 | 1:1000 | Abcom, UK | ab210515 |
